# Supplementary material
Source: PubMed Central journal article supplement (PMC2746782)
Supplement: 00400.2009_1.pdf [file 00400.2009_1.pdf]

|            | SRF area<br>(rads <sup>2</sup> ) | SRF width (rads) |           | SI           | SRF peak (degs) |       | W <sub>50</sub> (kHz) | F <sub>50</sub> (kHz) |
|------------|----------------------------------|------------------|-----------|--------------|-----------------|-------|-----------------------|-----------------------|
|            |                                  | Azimuth.         | Elevation |              | Azim.           | Elev. |                       |                       |
| <b>Ov</b>  |                                  |                  |           |              |                 |       |                       |                       |
| 1          | 1.20                             | 0.52             | 2.27      | 51.05        | 0.0             | 20.0  | 4.41                  | 6.30                  |
| 2          | 0.64                             | 0.27             | 0.87      | <b>31.59</b> | -60.0           | -60.0 | 2.20                  | 4.81                  |
| 3          | 4.41                             | 0.53             | 1.57      | 51.82        | -20.0           | -20.0 | 3.61                  | 6.13                  |
| 4          | 1.05                             | 0.56             | 2.27      | 58.44        | -10.0           | -30.0 | 1.95                  | 6.26                  |
| 5          | 3.11                             | 1.34             | 2.44      | 95.33        | 30.0            | -20.0 | 4.67                  | 3.84                  |
| 6          | 0.77                             | 0.56             | 1.57      | 56.49        | 10.0            | -30.0 | 6.48                  | 4.74                  |
| 7          | 1.78                             | 1.47             | 0.87      | 98.39        | 0.0             | 20.0  | 5.83                  | 4.41                  |
| 8          | 3.86                             | 0.42             | 1.57      | 79.09        | -20.0           | -10.0 | 3.87                  | 3.43                  |
| 9          | 0.88                             | 0.60             | 1.57      | 47.89        | -20.0           | -10.0 | 2.60                  | 5.72                  |
| 10         | 0.63                             | 0.60             | 1.92      | <b>28.49</b> | 0.0             | -20.0 | 3.79                  | 6.61                  |
| 11         | 1.17                             | 0.87             | 2.09      | 52.04        | 10.0            | 20.0  | 2.76                  | 6.38                  |
| 12         | 3.01                             | 1.21             | 2.27      | 62.12        | 10.0            | -10.0 | 4.88                  | 6.31                  |
| 13         | 2.04                             | 0.91             | 2.44      | 47.94        | 10.0            | -10.0 | 5.70                  | 4.83                  |
| 14         | 1.04                             | 0.76             | 1.92      | <b>33.44</b> | 0.0             | -10.0 | 4.50                  | 7.75                  |
| 15         | 1.54                             | 0.76             | 2.27      | 55.71        | 0.0             | 10.0  | 1.80                  | 6.02                  |
| 16         | 0.89                             | 0.60             | 1.57      | <b>33.64</b> | 20.0            | -10.0 | 4.21                  | 5.72                  |
| 17         | 1.16                             | 0.86             | 2.62      | 44.28        | 10.0            | 30.0  | 5.60                  | 4.40                  |
| 18         | 2.51                             | 1.15             | 2.44      | 63.44        | 20.0            | 0.0   | 2.90                  | 6.50                  |
| 19         | 3.88                             | 1.97             | 2.44      | 84.83        | 60.0            | 0.0   | 5.89                  | 4.44                  |
| 20         | 1.66                             | 0.34             | 2.09      | <b>37.12</b> | 10.0            | 10.0  | 4.90                  | 3.95                  |
| 21         | 0.73                             | 0.53             | 1.92      | <b>36.72</b> | 10.0            | -20.0 | 1.87                  | 6.22                  |
| 22         | 3.21                             | 0.66             | 2.62      | 64.00        | 10.0            | 0.0   | 2.06                  | 5.46                  |
| 23         | 1.01                             | 0.86             | 1.40      | 38.73        | 0.0             | 30.0  | 6.05                  | 4.53                  |
| 24         | 0.67                             | 0.70             | 1.75      | 42.02        | 10.0            | -10.0 | 2.43                  | 5.11                  |
| 25         | 0.67                             | 0.69             | 2.09      | <b>20.62</b> | 0.0             | 5.0   | 2.77                  | 6.03                  |
| 26         | 0.82                             | 0.69             | 2.62      | <b>34.65</b> | 0.0             | 30.0  | 3.32                  | 5.60                  |
| 27         | 0.82                             | 0.67             | 2.09      | <b>35.95</b> | 0.0             | -20.0 | 2.11                  | 5.23                  |
| 28         | 0.39                             | 0.22             | 1.22      | <b>18.41</b> | -10.0           | -30.0 | 6.63                  | 5.10                  |
| 29         | 1.68                             | 1.03             | 2.62      | 52.27        | 0.0             | 10.0  | 2.33                  | 4.69                  |
| 30         | 6.58                             | 0.24             | 2.09      | 79.94        | 0.0             | 0.0   | 2.59                  | 6.73                  |
| 31         | 0.85                             | 0.70             | 2.09      | 43.47        | 10.0            | 20.0  | 5.00                  | 5.50                  |
| 32         | 1.58                             | 0.91             | 2.09      | 46.68        | 20.0            | -15.0 | 1.97                  | 4.58                  |
| 33         | 1.97                             | 0.79             | 1.92      | 59.69        | 10.0            | -30.0 | 3.58                  | 5.14                  |
| 34         | 0.60                             | 0.45             | 1.92      | <b>18.04</b> | 20.0            | -10.0 | 2.88                  | 5.30                  |
| 35         | 1.71                             | 0.91             | 2.27      | 48.16        | 10.0            | -10.0 | 2.25                  | 5.17                  |
| 36         | 2.23                             | 0.94             | 2.44      | 74.19        | 20.0            | 0.0   | 4.93                  | 3.47                  |
| 37         | 2.77                             | 1.36             | 2.27      | 88.45        | 10.0            | -10.0 | 5.31                  | 3.65                  |
| 38         | 0.86                             | 1.03             | 1.57      | 43.18        | 10.0            | 30.0  | 3.12                  | 5.55                  |
| 39         | 0.82                             | 0.60             | 1.75      | 47.69        | 0.0             | -20.0 | 2.70                  | 5.53                  |
| 40         | 0.70                             | 0.12             | 1.57      | <b>34.24</b> | 0.0             | -50.0 | 3.56                  | 3.23                  |
| 41         | 0.92                             | 0.82             | 1.92      | <b>28.31</b> | 10.0            | -10.0 | 2.75                  | 4.93                  |
| 42         | 2.02                             | 1.21             | 1.40      | 59.66        | -50.0           | -10.0 | 5.75                  | 3.88                  |
| 43         | 0.52                             | 1.22             | 0.25      | <b>11.93</b> | 10.0            | 10.0  | 1.19                  | 5.89                  |
| 44         | 0.53                             | 0.70             | 1.22      | <b>14.90</b> | 20.0            | -10.0 | 4.18                  | 7.11                  |
| 45         | 0.95                             | 0.67             | 1.40      | 46.62        | -10.0           | -20.0 | 3.55                  | 4.58                  |
| <b>ICx</b> |                                  |                  |           |              |                 |       |                       |                       |
| 1          | 1.38                             | 0.69             | 2.09      | 32.01        | -10.0           | 30.0  | 3.53                  | 5.24                  |
| 2          | 1.14                             | 0.69             | 2.09      | 28.52        | -10.0           | 10.0  | 2.49                  | 6.48                  |
| 3          | 1.12                             | 1.03             | 2.09      | 28.47        | 50.0            | 30.0  | 2.54                  | 4.37                  |
| 4          | 0.46                             | 0.86             | 0.87      | 23.57        | 50.0            | 30.0  | 2.23                  | 4.05                  |
| 5          | 0.66                             | 0.66             | 1.05      | 19.89        | 40.0            | 0.0   | 2.66                  | 4.47                  |
| 6          | 0.95                             | 0.87             | 2.27      | 24.64        | 20.0            | 20.0  | 3.51                  | 5.02                  |
| 7          | 0.67                             | 0.53             | 1.92      | 28.13        | 20.0            | -20.0 | 3.86                  | 5.80                  |
| 8          | 0.82                             | 0.60             | 1.92      | 21.97        | 20.0            | -10.0 | 3.88                  | 5.59                  |
| 9          | 1.07                             | 0.56             | 1.92      | 37.26        | 10.0            | -30.0 | 4.69                  | 3.79                  |
| 10         | 0.28                             | 0.40             | 1.40      | 12.26        | 0.0             | -20.0 | 2.26                  | 5.15                  |
| 11         | 0.46                             | 0.40             | 1.92      | 19.83        | 0.0             | -20.0 | 2.39                  | 5.33                  |
| 12         | 0.62                             | 0.49             | 1.74      | 16.51        | 20.0            | 0.0   | 4.43                  | 7.47                  |
| 13         | 0.61                             | 0.15             | 0.87      | 35.17        | 30.0            | -60.0 | 0.89                  | 5.66                  |
| 14         | 0.59                             | 0.45             | 1.40      | 12.19        | 20.0            | -10.0 | 1.55                  | 5.00                  |
| 15         | 0.98                             | 0.65             | 2.09      | 19.50        | 20.0            | 0.0   | 1.91                  | 5.07                  |
| 16         | 0.74                             | 0.45             | 1.57      | 29.41        | 10.0            | -30.0 | 2.35                  | 4.90                  |
| 17         | 0.89                             | 0.69             | 2.27      | 28.31        | 20.0            | 10.0  | 1.60                  | 4.15                  |
| 18         | 0.21                             | 0.34             | 1.22      | 17.72        | 20.0            | -30.0 | 1.19                  | 5.93                  |
| 19         | 0.35                             | 0.45             | 1.22      | 25.18        | 20.0            | -30.0 | 1.92                  | 5.58                  |
